# Supplementary material for: Assessing the performance and microbial structure of biofilms adhering on aerated membranes for domestic saline sewage treatment
Source: Royal Society of Chemistry journal article supplement (doi:10.1039/c7ra03755d), 2017-01-01

## **Assessing the performance and microbial structure of biofilms adhering on aerated membranes for domestic saline sewage treatment**

**Hailong Tian**<sup>1+</sup> • **Jie Liu**<sup>2+</sup> • **Tengteng Feng**<sup>3</sup> • **Haifeng Li**<sup>1</sup> • **Xiaolei Wu**<sup>7\*</sup> •  
**Baoan Li**<sup>4,5,6\*</sup>

<sup>1</sup> *College of Bioengineering, Henan University of Technology, Zhengzhou 450001, PR China*

<sup>2</sup> *College of Architecture and Urban Planning, Chongqing Jiaotong University, Chongqing 400074, PR China*

<sup>3</sup> *Shandong Academy of Environmental Science, Jinan 250013, PR China*

<sup>4</sup> *State Key Laboratory of Chemical Engineering, Tianjin University, Tianjin 300072, PR China*

<sup>5</sup> *Collaborative Innovation Center of Chemical Science and Engineering, Tianjin 300072, PR China*

<sup>6</sup> *Tianjin Key Laboratory of Membrane Science and Desalination Technology, Tianjin University, Tianjin 300072, PR China*

<sup>7</sup> *Department of Energy and Resources Engineering, College of Engineering, Peking University, Beijing 100871, PR China*

<sup>+</sup>These authors contributed equally to this work.

### **\*Corresponding author:**

Baoan Li (for wastewater treatment) Tel.: +86-22-27407854; Fax: +86-22-27404496;  
E-mail: baoan.li@gmail.com; Postal address: 92 Weijin Road, Nankai District,  
Tianjin, China.

Xiaolei Wu (for microbiology), Phone/Fax: +86-10-62759047. E-  
mail: xiaolei\_wu@pku.edu.cn

## Supplementary

**Table S1** Components of the synthetic wastewater

| Synthetic wastewater                            | Concentration (mg/L) |
|-------------------------------------------------|----------------------|
| CH <sub>3</sub> COONa                           | See Table 1          |
| NH <sub>4</sub> Cl                              | See Table 1          |
| NaHCO <sub>3</sub>                              | 45                   |
| KH <sub>2</sub> PO <sub>4</sub>                 | 80                   |
| K <sub>2</sub> SO <sub>4</sub>                  | 45                   |
| MgSO <sub>4</sub> •7H <sub>2</sub> O            | 55                   |
| Na <sub>2</sub> CO <sub>3</sub>                 | 70                   |
| Fe <sub>2</sub> (SO <sub>4</sub> ) <sub>3</sub> | 0.1                  |
| MnSO <sub>4</sub>                               | 0.1                  |
| CuSO <sub>4</sub>                               | 0.1                  |
| ZnSO <sub>4</sub>                               | 0.1                  |

**Table S2** The PCR system for bacterial 16S rDNA

| <b>Bacteria</b>                  |             |
|----------------------------------|-------------|
| PCR mixture                      |             |
| 5×Pfu Buffer                     | 10 µl       |
| 2.5 µM dNTP                      | 5 µl        |
| 341F 5 pmol/µl (forward primer)  | 1.25 µl     |
| 1073R 5 pmol/µl (reverse primer) | 1.25 µl     |
| FastPfu Polymerase               | 1 µl        |
| Template DNA                     | 40-50 ng    |
| ddH <sub>2</sub> O               | 29 µl       |
| Total                            | 50 µl       |
| PCR conditions                   |             |
| 95 °C (initial denaturation)     | 2 min       |
| 95 °C (denaturation)             | 30 s        |
| 56 °C (annealing)                | 30 s        |
| 72 °C (elongation)               | 30 s        |
|                                  | } 24 cycles |
| 72 °C (final elongation)         | 5 min       |

**Table S3** The PCR system for archaeal 16S rDNA

| <b>Archaea</b>                   |          |
|----------------------------------|----------|
| First round                      |          |
| PCR mixture                      |          |
| 5×Pfu Buffer                     | 4 µL     |
| 2.5 µM dNTP                      | 2 µL     |
| 109F 5 pmol/µl (forward primer)  | 0.5 µL   |
| 915R 5 pmol/µl (reverse primer)  | 0.5 µL   |
| FastPfu Polymerase               | 0.4 µL   |
| Template DNA                     | 40-50 ng |
| ddH <sub>2</sub> O               | 11.6 µL  |
| Total                            | 20 µL    |
| PCR conditions                   |          |
| 95 °C (initial denaturation)     | 2 min    |
| 95 °C (denaturation)             | 30 s     |
| 54 °C (annealing)                | 30 s     |
| 72 °C (elongation)               | 30 s     |
| 72 °C (final elongation)         | 5 min    |
| } 28 cycles                      |          |
| Second round                     |          |
| PCR mixture                      |          |
| 5×Pfu Buffer                     | 10 µL    |
| 2.5 µM dNTP                      | 5 µL     |
| 339F 5 pmol/µL (forward primer)  | 1.25 µL  |
| 1048R 5 pmol/µL (reverse primer) | 1.25 µL  |
| FastPfu Polymerase               | 1 µL     |
| DNA                              | 40-50 ng |
| ddH <sub>2</sub> O               | 29 µL    |
| Total                            | 50 µL    |
| PCR conditions                   |          |
| 95 °C (initial denaturation)     | 2 min    |
| 95 °C (denaturation)             | 30 s     |
| 54 °C (annealing)                | 30 s     |
| 72 °C (elongation)               | 30 s     |
| 72 °C (final elongation)         | 5 min    |
| } 21 cycles                      |          |

**Fig. S1** Variations in  $\text{COD}_{\text{Cr}}$ ,  $\text{NH}_4\text{-N}$ , TN,  $\text{NO}_2\text{-N}$ ,  $\text{NO}_3\text{-N}$  and DO under three salinities in an 24 h HRT.

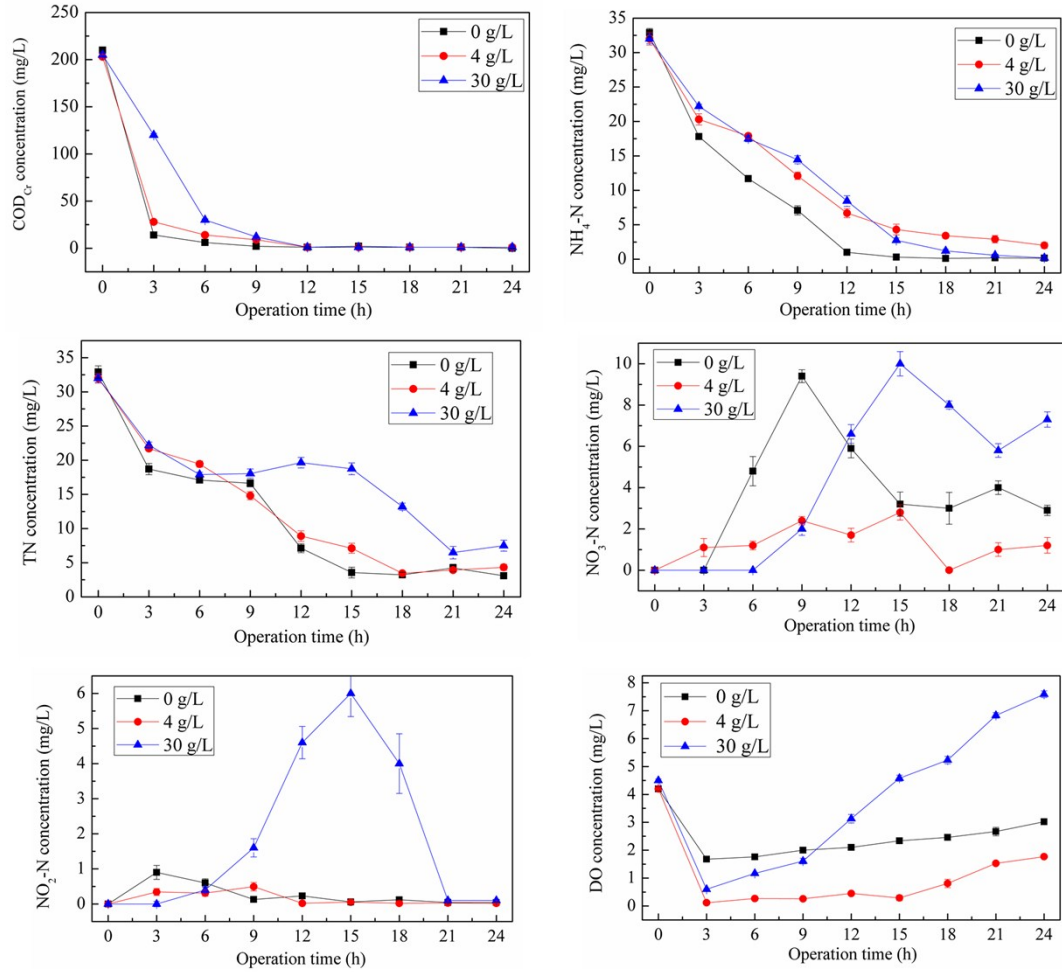

**Fig. S2** The bacterial compositions in each biosample at different classification levels. The hot map (c) just listed the identified families no less than 1% in one sample, and the color bar represented the relative abundance in total reads.

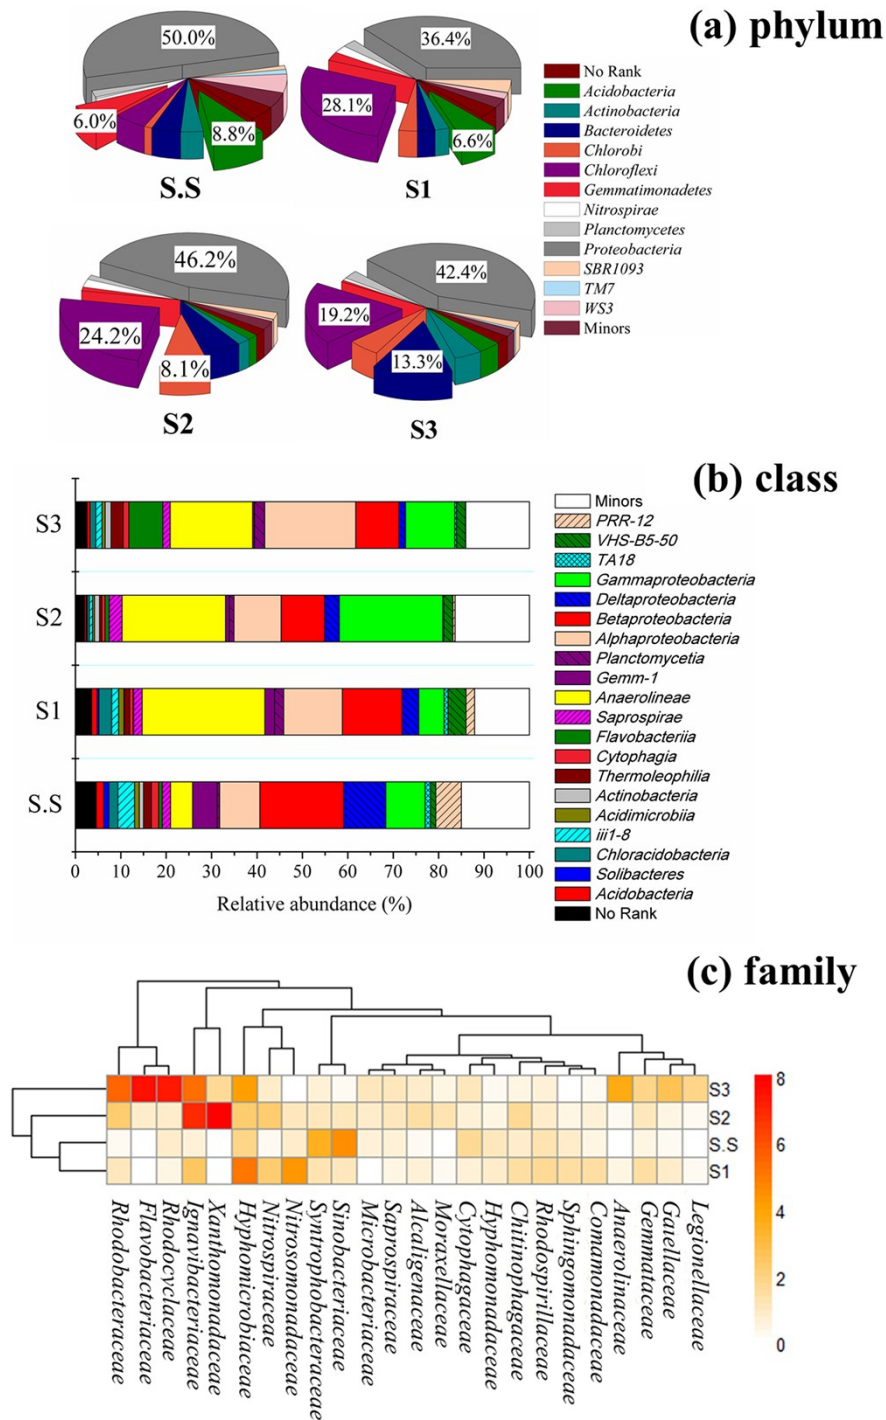

Supplement: c7ra03755d1.pdf [file c7ra03755d1.pdf]
